# Supplementary material for: Butyrate-Induced Transcriptional Changes in Human Colonic Mucosa
Source: PLoS One. 2009 Aug 25;4(8):e6759. doi: 10.1371/journal.pone.0006759 (PMC2727000; doi:10.1371/journal.pone.0006759)
Supplement: Table S3 — This Table shows each of the 501 significantly regulated genes and the foldchanges. (0.07 MB XLS) [file pone.0006759.s003.xls]

## Sheet: Sheet1
gene	fc
Hs.610283	0.7326
Hs.547580	0.7744
Hs.626427	0.7944
Hs.594654	0.7988
Hs.598331	0.8107
Hs.623586	0.8243
Hs.643116	0.8364
Hs.8102	0.8427
Hs.634850	0.8437
Hs.619120	0.8468
Hs.332156	0.8504
Hs.593614	0.8539
Hs.596164	0.855
Hs.624050	0.8718
Hs.642601	0.8763
Hs.596854	0.8785
Hs.568045	0.8817
Hs.592712	0.8832
Hs.150793	0.8858
Hs.631536	0.8975
Hs.611638	0.9004
Hs.636080	0.903
Hs.640380	0.906
Hs.593826	0.9067
Hs.597007	0.9067
Hs.213087	0.9086
Hs.630427	0.9086
Hs.102798	1.1001
Hs.16606	1.1001
Hs.335551	1.1001
Hs.591145	1.1002
Hs.636329	1.1002
Hs.298716	1.1003
Hs.437779	1.1003
Hs.532699	1.1004
Hs.555926	1.1004
Hs.514199	1.1005
Hs.258429	1.1006
Hs.292009	1.1006
Hs.502914	1.1006
Hs.511138	1.1007
Hs.567523	1.1007
Hs.200738	1.1008
Hs.632469	1.1009
Hs.77422	1.1009
Hs.78888	1.1009
Hs.213534	1.101
Hs.446017	1.101
Hs.567366	1.101
Hs.250758	1.1011
Hs.421724	1.1011
Hs.128676	1.1012
Hs.591332	1.1012
Hs.593679	1.1012
Hs.595644	1.1012
Hs.528763	1.1013
Hs.6686	1.1014
Hs.527412	1.1016
Hs.538286	1.1016
Hs.471975	1.1017
Hs.515258	1.1017
Hs.614801	1.1017
Hs.632768	1.1017
Hs.17250	1.1018
Hs.23862	1.1018
Hs.19673	1.102
Hs.119251	1.1021
Hs.472558	1.1021
Hs.5741	1.1021
Hs.594563	1.1021
Hs.71787	1.1021
Hs.155742	1.1024
Hs.23198	1.1024
Hs.516111	1.1024
Hs.188606	1.1025
Hs.288382	1.1026
Hs.558009	1.1026
Hs.531624	1.1027
Hs.55235	1.1027
Hs.44017	1.1028
Hs.610436	1.1028
Hs.9194	1.1028
Hs.472793	1.1029
Hs.75659	1.1029
Hs.104203	1.103
Hs.409140	1.103
Hs.497353	1.103
Hs.503911	1.103
Hs.467408	1.1032
Hs.111903	1.1034
Hs.443723	1.1034
Hs.32018	1.1035
Hs.599024	1.1035
Hs.76244	1.1035
Hs.502004	1.1036
Hs.26216	1.1037
Hs.483454	1.1037
Hs.514373	1.1037
Hs.1376	1.1038
Hs.4993	1.1038
Hs.627962	1.1038
Hs.72363	1.1039
Hs.464422	1.104
Hs.505652	1.104
Hs.38972	1.1041
Hs.484188	1.1042
Hs.632215	1.1043
Hs.356769	1.1044
Hs.595752	1.1044
Hs.356270	1.1045
Hs.529571	1.1045
Hs.584950	1.1046
Hs.280990	1.1047
Hs.567488	1.1047
Hs.614545	1.1049
Hs.495985	1.105
Hs.271264	1.1051
Hs.221889	1.1052
Hs.299208	1.1052
Hs.179565	1.1053
Hs.21701	1.1053
Hs.50334	1.1056
Hs.567571	1.1056
Hs.403171	1.1057
Hs.17949	1.1059
Hs.211594	1.1059
Hs.492407	1.1059
Hs.513141	1.1059
Hs.596458	1.1059
Hs.406840	1.106
Hs.436187	1.106
Hs.75160	1.106
Hs.129719	1.1062
Hs.534575	1.1062
Hs.119591	1.1063
Hs.627196	1.1063
Hs.140309	1.1064
Hs.155097	1.1064
Hs.271014	1.1064
Hs.595678	1.1064
Hs.25313	1.1065
Hs.50130	1.1065
Hs.5662	1.1065
Hs.595426	1.1065
Hs.24379	1.1066
Hs.511251	1.1066
Hs.514174	1.1066
Hs.580808	1.1066
Hs.595864	1.1067
Hs.268530	1.1068
Hs.328865	1.1069
Hs.452445	1.107
Hs.284141	1.1071
Hs.466165	1.1071
Hs.501280	1.1071
Hs.130413	1.1072
Hs.154073	1.1072
Hs.410197	1.1072
Hs.514065	1.1073
Hs.289271	1.1074
Hs.624418	1.1074
Hs.140452	1.1075
Hs.268849	1.1076
Hs.469171	1.1076
Hs.503043	1.1076
Hs.505676	1.1077
Hs.592292	1.1078
Hs.6076	1.1079
Hs.25597	1.108
Hs.465645	1.108
Hs.598842	1.108
Hs.482038	1.1081
Hs.15591	1.1084
Hs.31431	1.1084
Hs.533282	1.1084
Hs.591923	1.1084
Hs.593308	1.1084
Hs.82432	1.1085
Hs.491682	1.1086
Hs.515371	1.1086
Hs.227729	1.1087
Hs.118110	1.1088
Hs.126221	1.1088
Hs.568881	1.1088
Hs.632415	1.1088
Hs.284286	1.1091
Hs.250905	1.1093
Hs.406515	1.1093
Hs.82002	1.1093
Hs.278569	1.1094
Hs.356766	1.1094
Hs.468864	1.1094
Hs.212102	1.1095
Hs.5920	1.1095
Hs.614308	1.1095
Hs.596717	1.1098
Hs.632430	1.1099
Hs.77558	1.1099
Hs.130774	1.11
Hs.503345	1.11
Hs.58351	1.11
Hs.432330	1.1101
Hs.14317	1.1102
Hs.591998	1.1103
Hs.592920	1.1104
Hs.567405	1.1105
Hs.592781	1.1106
Hs.414809	1.1107
Hs.418450	1.1107
Hs.504609	1.1107
Hs.604630	1.1108
Hs.430733	1.1109
Hs.63290	1.1109
Hs.232543	1.1111
Hs.597689	1.1112
Hs.445570	1.1114
Hs.491988	1.1114
Hs.591729	1.1114
Hs.619260	1.1117
Hs.95577	1.1117
Hs.513987	1.1118
Hs.406068	1.112
Hs.81328	1.1122
Hs.256632	1.1123
Hs.592970	1.1124
Hs.432792	1.1125
Hs.603284	1.1125
Hs.434401	1.1129
Hs.401537	1.1133
Hs.408073	1.1133
Hs.241543	1.1137
Hs.493164	1.1137
Hs.579928	1.1137
Hs.433951	1.114
Hs.160958	1.1145
Hs.622151	1.1145
Hs.271510	1.1148
Hs.496984	1.1148
Hs.82609	1.115
Hs.376722	1.1152
Hs.388004	1.1152
Hs.505077	1.1152
Hs.302287	1.1153
Hs.511801	1.1155
Hs.513230	1.1157
Hs.518236	1.1158
Hs.379754	1.1159
Hs.523302	1.1161
Hs.591333	1.1162
Hs.317192	1.1164
Hs.584846	1.1164
Hs.610390	1.1164
Hs.131188	1.1165
Hs.471205	1.1165
Hs.202	1.1169
Hs.515242	1.1169
Hs.621002	1.1171
Hs.445899	1.1176
Hs.515714	1.1176
Hs.93659	1.1176
Hs.324844	1.1177
Hs.636012	1.1177
Hs.587054	1.1178
Hs.400740	1.118
Hs.133968	1.1181
Hs.280378	1.1181
Hs.504620	1.1185
Hs.306764	1.1186
Hs.368610	1.1186
Hs.405061	1.1186
Hs.592048	1.1187
Hs.321689	1.1189
Hs.404119	1.1189
Hs.447011	1.1191
Hs.525527	1.1191
Hs.242458	1.1192
Hs.333579	1.1192
Hs.596307	1.1192
Hs.284295	1.1198
Hs.461379	1.12
Hs.272805	1.1201
Hs.355606	1.1205
Hs.9825	1.1205
Hs.163543	1.1206
Hs.436121	1.1207
Hs.593910	1.1207
Hs.437388	1.1209
Hs.606526	1.1209
Hs.9857	1.1209
Hs.33642	1.121
Hs.514036	1.121
Hs.122115	1.1211
Hs.386791	1.1211
Hs.506374	1.1211
Hs.567513	1.1211
Hs.247077	1.1212
Hs.508835	1.1212
Hs.352661	1.1215
Hs.595358	1.1215
Hs.106534	1.1217
Hs.610620	1.1217
Hs.522632	1.1218
Hs.291079	1.1219
Hs.444664	1.122
Hs.532803	1.122
Hs.591190	1.1222
Hs.537450	1.1226
Hs.464903	1.1227
Hs.567968	1.1227
Hs.491494	1.1228
Hs.445040	1.1231
Hs.639563	1.1233
Hs.74564	1.1237
Hs.379466	1.1238
Hs.466507	1.1241
Hs.616689	1.1242
Hs.479214	1.1243
Hs.76884	1.1247
Hs.478481	1.1248
Hs.369052	1.1253
Hs.158341	1.1254
Hs.643093	1.1255
Hs.503716	1.1258
Hs.442609	1.126
Hs.352656	1.1262
Hs.270291	1.1263
Hs.306329	1.1265
Hs.406510	1.1265
Hs.598859	1.1265
Hs.146602	1.1269
Hs.520740	1.1281
Hs.224012	1.1283
Hs.315177	1.1283
Hs.605980	1.1285
Hs.445078	1.1286
Hs.15106	1.1289
Hs.524081	1.1289
Hs.75969	1.1289
Hs.20157	1.129
Hs.377416	1.1292
Hs.94896	1.1292
Hs.303116	1.1293
Hs.528780	1.1293
Hs.421848	1.1294
Hs.617818	1.1295
Hs.22137	1.1296
Hs.7471	1.13
Hs.198269	1.1308
Hs.275865	1.1311
Hs.515500	1.1311
Hs.51483	1.1312
Hs.513043	1.1314
Hs.76686	1.1314
Hs.483408	1.1318
Hs.497599	1.1318
Hs.533709	1.1318
Hs.178551	1.1319
Hs.585839	1.1322
Hs.589558	1.1324
Hs.356742	1.1326
Hs.509410	1.1329
Hs.24301	1.133
Hs.584985	1.1331
Hs.9003	1.1331
Hs.196176	1.1332
Hs.437178	1.1336
Hs.599807	1.134
Hs.86092	1.134
Hs.530823	1.1342
Hs.524183	1.1343
Hs.472330	1.1344
Hs.534783	1.1345
Hs.433203	1.1347
Hs.472024	1.1347
Hs.47546	1.1347
Hs.515785	1.1348
Hs.436405	1.1349
Hs.523936	1.1349
Hs.523456	1.1351
Hs.512973	1.1358
Hs.31439	1.136
Hs.595132	1.1363
Hs.11417	1.1368
Hs.534453	1.1368
Hs.603913	1.1372
Hs.75227	1.1373
Hs.512842	1.1374
Hs.258501	1.1375
Hs.604481	1.1375
Hs.610989	1.1375
Hs.600300	1.1377
Hs.623072	1.1377
Hs.409563	1.138
Hs.295563	1.1381
Hs.13845	1.1384
Hs.524308	1.1388
Hs.514489	1.1389
Hs.430606	1.1394
Hs.124027	1.1399
Hs.633043	1.1404
Hs.589427	1.141
Hs.523822	1.1411
Hs.149500	1.1415
Hs.386225	1.1417
Hs.79387	1.1421
Hs.163867	1.1422
Hs.600982	1.1422
Hs.593878	1.1425
Hs.75914	1.1428
Hs.406520	1.1436
Hs.356626	1.1438
Hs.597993	1.1453
Hs.525622	1.1455
Hs.74471	1.1456
Hs.630713	1.1459
Hs.512464	1.1461
Hs.9234	1.1461
Hs.14839	1.1462
Hs.590956	1.1462
Hs.514216	1.1466
Hs.459072	1.147
Hs.211282	1.1471
Hs.269654	1.1473
Hs.631569	1.1476
Hs.438429	1.1481
Hs.601558	1.1481
Hs.82793	1.1481
Hs.183109	1.1483
Hs.281898	1.1489
Hs.633742	1.1491
Hs.531081	1.1492
Hs.437638	1.1495
Hs.449585	1.1502
Hs.534450	1.1503
Hs.591916	1.1503
Hs.184877	1.151
Hs.611013	1.1512
Hs.624584	1.1513
Hs.504237	1.1518
Hs.424932	1.1535
Hs.518244	1.1549
Hs.89570	1.1551
Hs.241414	1.1554
Hs.433442	1.1555
Hs.147433	1.1556
Hs.171280	1.1564
Hs.484241	1.1565
Hs.74047	1.1569
Hs.567426	1.1573
Hs.3192	1.1586
Hs.18069	1.1588
Hs.642755	1.1588
Hs.599470	1.1599
Hs.279529	1.1602
Hs.54457	1.1616
Hs.166924	1.1617
Hs.106876	1.1618
Hs.335550	1.1628
Hs.502823	1.1632
Hs.288959	1.1635
Hs.603945	1.1637
Hs.596968	1.1645
Hs.7736	1.1658
Hs.74576	1.167
Hs.25447	1.1672
Hs.5462	1.1689
Hs.380887	1.169
Hs.434081	1.1691
Hs.499094	1.1697
Hs.607666	1.1699
Hs.78466	1.1699
Hs.111024	1.1707
Hs.279061	1.172
Hs.567328	1.1728
Hs.433759	1.1736
Hs.604861	1.1754
Hs.570362	1.1755
Hs.463456	1.1785
Hs.406530	1.1807
Hs.522310	1.1847
Hs.170107	1.1851
Hs.502528	1.1853
Hs.2556	1.1854
Hs.59889	1.1867
Hs.434937	1.1911
Hs.494691	1.1952
Hs.46423	1.197
Hs.232054	1.1994
Hs.7744	1.2001
Hs.389107	1.21
Hs.433278	1.2161
Hs.17466	1.2165
Hs.467192	1.2231
Hs.277704	1.2253
Hs.596282	1.2268
Hs.367833	1.2344
Hs.536218	1.2358
Hs.386793	1.2564
Hs.523443	1.2773
Hs.449630	1.3931
